# Supplementary material for: VapC Toxins from Mycobacterium tuberculosis Are Ribonucleases that Differentially Inhibit Growth and Are Neutralized by Cognate VapB Antitoxins
Source: PubMed Central journal article supplement (PMC3126847; doi:10.1371/journal.pone.0021738), 2011-06-29
Supplement: pone.0021738.s001.pdf [file pone.0021738.s001.pdf]

Conservation: 8 56

|               |   |                                                                         |              |    |
|---------------|---|-------------------------------------------------------------------------|--------------|----|
| Rv0624        | 1 | -----VIDTSA-----                                                        | LVAMLSDEPDA  | 17 |
| MSMEG_1284    | 1 | -----MVIDTSA-----                                                       | LVAILTDEPDA  | 18 |
| Rv2759c       | 1 | -----VIVDTSA-----                                                       | IVAVISGEGSA  | 18 |
| Rv0609        | 1 | -----VIVDTSA-----                                                       | IIAILRDEDDA  | 18 |
| Rv1982c       | 1 | -----MIVDTSA-----                                                       | VVALVQGERPH  | 18 |
| Rv0582        | 1 | -----VIIDTSA-----                                                       | LLAYFDAAEPD  | 18 |
| Rv1561        | 1 | -----MILIDTSA-----                                                      | WVEYFRATGSI  | 19 |
| Rv0065        | 1 | -----VDECVVDAAA-----                                                    | VVDALAGKGAS  | 21 |
| Rv3408        | 1 | -----VIYMDTSA-----                                                      | LTKLLISEPET  | 19 |
| Rv3384c       | 1 | -----MAAIYLDSSA-----                                                    | IVKLAVREPES  | 21 |
| Rv1962c       | 1 | -----VIYLETSA-----                                                      | LVKLIIRIEVES | 19 |
| Rv2231        | 1 | VLWILGPHGTGPLLFDVAVALDTSPLAAARYHGDQDVAPGVLDFAVNVHRDRPPEWLVRQLAALLPELARY | 70           |    |
| Rv0665        | 1 | -----VTEGEGVGLLDTSV-----                                                | FIARESGGAI-  | 25 |
| Rv0627        | 1 | -----VSTTPAAGVLDTSV-----                                                | FIATESGRQLD  | 25 |
| Rv0595c       | 1 | -----VNVRRALADTSV-----                                                  | FIGIEATRFDP  | 23 |
| Rv1720c       | 1 | -----VIVLDASA-----                                                      | AVELMLTTPAG  | 19 |
| Rv0960        | 1 | -----MIVVDASA-----                                                      | ALAALLND---  | 16 |
| Rv0661c       | 1 | -----MIVLDTTV-----                                                      | LVYAKGAEHPL  | 19 |
| Rv0549c       | 1 | -----VRASPTSPPEQVVVDASA-----                                            | MVDLLARTSDR  | 29 |
| Rv0656c       | 1 | -----                                                                   | LAATTTGTH    | 10 |
| Rv2596        | 1 | -----VIAPDTSV-----                                                      | LVAGFATWHEG  | 19 |
| Rv0598c       | 1 | -----VKPPLAVDTSV-----                                                   | APIPLLVRTHTA | 22 |
| Rv2548        | 1 | -----VKLIDTTI-----                                                      | AVDHLRGEP-   | 18 |
| Rv2103c       | 1 | -----MKIVDANV-----                                                      | LLYAVNTTSEH  | 19 |
| Rv1397c       | 1 | -----MILVSDV-----                                                       | LIAHLRGVV--  | 17 |
| Rv0617        | 1 | -----VTVLLDANV-----                                                     | LIALVVAEHVH  | 20 |
| Rv1838c       | 1 | -----VILVDSNI-----                                                      | PMYLVGASHPH  | 19 |
| Rv2010        | 1 | -----MIVDTSV-----                                                       | WIAYLSTSES-  | 17 |
| Rv1114        | 1 | -----VILVDTSV-----                                                      | WIEHLRAADA-  | 18 |
| Rv2602        | 1 | -----MLLCDTNI-----                                                      | WLALALSGHVH  | 19 |
| Rv3180c       | 1 | -----MTPNAASTGDSAKNITIGCCCLITARA-----                                   | LVARTRSISLP  | 37 |
| Rv3697c       | 1 | -----VSETFDVDV-----                                                     | LVHATHRASPF  | 20 |
| Rv3320c       | 1 | -----MRALLDENV-----                                                     | LLALLDRDHVD  | 20 |
| Rv2530c       | 1 | -----VTALLDENV-----                                                     | LIALGWPNVHVH | 20 |
| Rv2494        | 1 | -----VALLDVNA-----                                                      | LVALAWDSHIH  | 19 |
| Rv2872        | 1 | -----MLCVDNV-----                                                       | LVYHRADLRE   | 19 |
| Rv0749        | 1 | -----MFLLDANV-----                                                      | LLAAHRGDHPN  | 19 |
| Rv0277c       | 1 | -----MFLIDNV-----                                                       | LLAAHRGDHPN  | 19 |
| Rv2829c       | 1 | -----MTTVLLDSHV-----                                                    | AYWWSAEPQRL  | 21 |
| Rv1242        | 1 | -----VIIPDINL-----                                                      | LLYAVITGFPQ  | 19 |
| Rv2863        | 1 | -----MIFVDTNV-----                                                      | FMYAVGRDHP   | 19 |
| Rv2549c       | 1 | -----MIFVDTSF-----                                                      | WAALGNAGDAR  | 19 |
| Rv1953        | 1 | -----VTYVLDTNV-----                                                     | VVALRVVGRH-  | 19 |
| Rv2757c       | 1 | -----MTTRYLLDKSA-----                                                   | AYRAHLPV--   | 20 |
| Rv2546        | 1 | -----MVFCVDTSA-----                                                     | WHHAARPEV--  | 18 |
| Rv0301        | 1 | -----VTDQRWLIDKSA-----                                                  | LVRLTDSPP--  | 21 |
| Rv2527        | 1 | -----MTTWILDKSA-----                                                    | HVRLVAGAT--  | 19 |
| Rv0240        | 1 | -----VLSIDTNI-----                                                      | LLYAQRNDCPE  | 19 |
| Consensus_aa: |   | .....hhldhsh.....                                                       | hh.h.....    |    |
| Consensus_ss: |   | eeehhh                                                                  | hhhhh        |    |

Conservation: 6

|            |    |                                                                       |                               |    |
|------------|----|-----------------------------------------------------------------------|-------------------------------|----|
| Rv0624     | 18 | -----ERFEAAVEA-----                                                   | DHIRLMSTASYLETALVIEARF-----   | 48 |
| MSMEG_1284 | 19 | -----ELLEGAVID-----                                                   | DPVRTMSTASYLETAVIESRF-----    | 49 |
| Rv2759c    | 19 | -----QVLKEALER-----                                                   | SPNSRMSAPNYVELCAIMQRRD-----   | 49 |
| Rv0609     | 19 | -----AAYADALAN-----                                                   | ADVRRLSAASYLECGIVLDSQR-----   | 49 |
| Rv1982c    | 19 | A-----TLVAAALAG-----                                                  | AHSPVMSAPTVAECLIVLTARH-----   | 50 |
| Rv0582     | 19 | H-----AAVSECIDSS-----                                                 | ADALVVSPPYVAELDYLVATRV-----   | 51 |
| Rv1561     | 20 | A-----AVEVRRLSEE-----                                                 | AARIAMCEPIAMEILSGALD-----     | 51 |
| Rv0065     | 22 | A-----IVLRGLLKE-----                                                  | SISNAPHLLDAEVGHALRRRAVLSDEI-  | 57 |
| Rv3408     | 20 | -----TELRTWLTAQSG-----                                                | QGEDAATSTLGRVSESMRVVARYGQP--  | 56 |
| Rv3384c    | 22 | -----DALRRYLRT-----                                                   | RHPRVSSALARAEMRALLDKGE-----   | 53 |
| Rv1962c    | 20 | -----DALADWLDDR-----                                                  | TELRWITSALTEVELSRAIRAVSP----- | 53 |
| Rv2231     | 71 | PST-DDVHRAQDAVAERHGRTRDEVLPVGAAGFALLHNLSPVRAAIVVPAFTPEPAIALSAAGITAHHV | 139                           |    |
| Rv0665     | 26 | -----ADL-----                                                         | PERVALSVMTIGELQLGLLNAGDS----- | 52 |
| Rv0627     | 26 | -----EALI-----                                                        | PDRVATTVVTLAELRVGLAAAT-----   | 53 |
| Rv0595c    | 24 | -----DRFA-----                                                        | GYEWGVSVVTLGELRLGLVQASGP----- | 51 |
| Rv1720c    | 20 | -----AAVAR-RLR-----                                                   | GETVHAPAHFDVEVIGAIRQAVVRQL--  | 53 |
| Rv0960     | 17 | -----GQARQ-LIA-----                                                   | AERLHVPHLVDSEIASGLRRLAQQRDR-- | 50 |
| Rv0661c    | 20 | R-----DPCRDLVAAIAD-----                                               | ERIAATTAETVIEQFVHVRRRR-----   | 55 |
| Rv0549c    | 30 | C-----SAVRA-RLA-----                                                  | RTAMHAPAHFDVAVLSALGRMQRAGA--  | 64 |
| Rv0656c    | 11 | -----RGGLEL-RAA-----                                                  | QRAVGSCEPQRAEFCSRARN-----     | 38 |
| Rv2596     | 20 | H-----EAAVRALNR-----                                                  | GVHLIAHAAVETYSVLTRLPPPPhrI-   | 54 |
| Rv0598c    | 23 | H-----AAVVAWWAH-----                                                  | REAAALCGHALAETYSVLTRLPRDLRL-  | 58 |
| Rv2548     | 19 | -----AAVLLAELIN-----                                                  | NGEEIAASELVRFELLAGVRES-----   | 50 |
| Rv2103c    | 20 | H-----KPSLRWLDGALS-----                                               | GADRVGFVAVVPLAFVRLATKVGLFPRPL | 61 |
| Rv1397c    | 18 | -----AARDWLVASAR-----                                                 | KDGPLAISVVSTAELIGMRR-----     | 47 |
| Rv0617     | 21 | H-----DAAADWLMAS-----                                                 | DTGFATCPMTQGSLVRFVLRSGQ-----  | 54 |
| Rv1838c    | 20 | K-----LDAQRLLESALS-----                                               | GGERLVTDAEVLQETICHRYVAI-----  | 54 |

|               |    |                         |                               |    |
|---------------|----|-------------------------|-------------------------------|----|
| Rv2010        | 18 | -----LASRWLADRIA-----   | ADSTVIVPEVVMPELLIGKTDE-----   | 50 |
| Rv1114        | 19 | -----RLVELL-----        | GDDEAGCHPLVIEELALGSIKQ-----   | 46 |
| Rv2602        | 20 | H-----RASRAWLDTIN-----  | APGVIHFCRATQQSLLRLLTNRVTLGAYG | 60 |
| Rv3180c       | 38 | GMFFRMPADYHNASSD-----   | EPNRRHPWAPARCCRHE-----        | 71 |
| Rv3697c       | 21 | H-----DKAKTLVERFLA----- | GPGLVYLLWPVALGYLRVVTHTPLLGAFL | 62 |
| Rv3320c       | 21 | H-----ERARAWITGQI-----  | ERGWASCAITQNGFVRVISQPRYPSPIT- | 59 |
| Rv2530c       | 21 | H-----AAAQRWFTQFS-----  | SNGWATTPITEAGYVRISSNRSVMQVST  | 60 |
| Rv2494        | 20 | H-----ARIREWFTANA-----  | TLGWATCPLTEAGFVRVSTNPKVLPSTAI | 59 |
| Rv2872        | 20 | H-----ADYRGLLERLAN----- | DDEPLGLPDSVLAGFIRVVTNRRVFTEPT | 61 |
| Rv0749        | 20 | H-----RTVRPWFDRLLA----- | ADDPFTVPLNVWASFLRLATNRRIFEIPS | 61 |
| Rv0277c       | 20 | H-----RTVRPWFDRLLA----- | ADDPFTVPLNVWASFLRLTNRRIFEIPS  | 61 |
| Rv2829c       | 22 | S-----MAASQAIIEH-----   | ADELAVAAISWFLAWLAEQERIQLE---  | 56 |
| Rv1242        | 20 | H-----RRAHAWQDVTN-----  | GHTRIGLTPALFGFLRIATSARVLAAPL  | 61 |
| Rv2863        | 20 | R-----MPAREFLEHSLA----- | HQDRLVTSAEAMQLELNAVYPVGR----- | 56 |
| Rv2549c       | 20 | H-----GTAKRLWASK-----   | PPVVMTSNHVLGETWTLLNRRCG-----  | 53 |
| Rv1953        | 20 | -----PAVAAWADSV-----    | QVAEQFVVAITLAEIERGVIAKER----- | 53 |
| Rv2757c       | 21 | -----RHRLEPLM-----      | ERGLLARCIGITDLEFGVSARSR-----  | 50 |
| Rv2546        | 19 | -----ARRWLAAL-----      | SADQIGICDHVRLEILYSANSA-----   | 48 |
| Rv0301        | 22 | -----MEIWSNRI-----      | ERGLVHITGVTRLEVGFSAECGE-----  | 52 |
| Rv2527        | 20 | -----PPAGI-----         | DLTDLAICDIGELEWLYSARSA-----   | 46 |
| Rv0240        | 20 | H-----DAAAFLVECA-----   | GRADVAVCELVLMELYQLLRNPTVVTRPL | 60 |
| Consensus aa: |    | .....h..hh.....         | ..h.hs..h..ph..h.....         |    |
| Consensus ss: |    | hhhhhhhhh               | eee hhhhhhhhhh                |    |

Conservation:

|               |     |                                                |                     |           |           |    |
|---------------|-----|------------------------------------------------|---------------------|-----------|-----------|----|
| Rv0624        | 49  | -----GEPGGRELDLWL-----                         | HRA-----            | AVDLVAVHA | 72        |    |
| MSMEG_1284    | 50  | -----GEPGGRELDLWL-----                         | HRA-----            | SVALVAVDA | 73        |    |
| Rv2759c       | 50  | -----RPEISRLVDRLL-----                         | DDY-----            | GIQVEAVDA | 73        |    |
| Rv0609        | 50  | -----DPVISRALDELI-----                         | EEA-----            | EFVVEPVE  | 73        |    |
| Rv1982c       | 51  | -----GPVARTIFERLR-----                         | SEI-----            | GLSVSSFTA | 74        |    |
| Rv0582        | 52  | -----GVDDELAVLREL-----                         | AGG-----            | AWELANCGA | 75        |    |
| Rv1561        | 52  | -----DNHTTTLERLV-----                          | NGL-----            | PSLNV-DDA | 73        |    |
| Rv0065        | 58  | -----SEEQARAALDAL-----                         | PYL-----            | IDNRYPHSP | 81        |    |
| Rv3408        | 57  | -----GQTERARYLL-----                           | DGL-----            | DILPLTE   | 76        |    |
| Rv3384c       | 54  | -----SARKAGRRL-----                            | AHL-----            | DLLRVDK   | 73        |    |
| Rv1962c       | 54  | -----EGLPAVPSVL-----                           | ARL-----            | DRFEIDA   | 73        |    |
| Rv2231        | 140 | VLKPPFVLDTAHVPDDADLVVVGNPNTPSVLHLREQLLELR----- | RPG-----            | RILVUDE   | 191       |    |
| Rv0665        | 53  | -----ATRSRRADTLALA-----                        | RTA-----            | DQIPVSE   | 75        |    |
| Rv0627        | 54  | -----DIRAQRLLATLESV-----                       | ADM-----            | ETLPVDD   | 76        |    |
| Rv0595c       | 52  | -----EAAARLSTYQLA-----                         | QRF-----            | EPLGIDE   | 74        |    |
| Rv1720c       | 54  | -----ISDHEGLVVVVF-----                         | LSL-----            | PVRRWPK-  | 77        |    |
| Rv0960        | 51  | -----LGAADGRRALQTW-----                        | RRL-----            | AVTRYPVV- | 94        |    |
| Rv0661c       | 56  | -----DRSDAA-ALGRVTMPNCSRYSPEIATSKRGLTLFETTP    |                     |           | 74        |    |
| Rv0549c       | 65  | -----LTVAYVDAALEEL-----                        | RQV-----            | PVTRHGLSS | 89        |    |
| Rv0656c       | 39  | -----ADEFDQMSRMF-----                          | GDV-----            | YDPVPVK   | 60        |    |
| Rv2596        | 55  | -----APVAVHAYLADIT-----                        | SSNYLALDA           |           | 76        |    |
| Rv0598c       | 59  | -----APMDAARLLTERF-----                        |                     | AAPLLLSS  | 79        |    |
| Rv2548        | 51  | -----ELAALEAFF-----                            | SAV-----            | VWTLVTE   | 69        |    |
| Rv2103c       | 62  | -----PREAAITQVADWL-----                        | AAP-----            | SAVLVNPTV | 86        |    |
| Rv1397c       | 48  | -----TAERREVWRLL-----                          | ASF-----            | RVQPATE   | 68        |    |
| Rv0617        | 55  | -----SAAAARDVVSAVQ-----                        | CTS-----            | RHEFWPDAL | 79        |    |
| Rv1838c       | 55  | -----KRREAIQPAFDAT-----                        | IGV-----            | VDEVLPIER | 79        |    |
| Rv2010        | 51  | -----DTAALRRRL-----                            | QRF-----            | AIEPLAP   | 70        |    |
| Rv1114        | 47  | -----RDVVLDLL-----                             | ANL-----            | YQFPVVT   | 64        |    |
| Rv2602        | 61  | SP-----DDDD-----                               | PLTNREAWAAYAFL----- | DDD-----  | RIVLAGAEP | 89 |
| Rv3180c       | 72  | -----WRTMRRTN-----                             | ACDRRR-----         | FGLSLTIHE | 94        |    |
| Rv3697c       | 63  | -----APEVAVENIEQFT-----                        | SRP-----            | HVRQVGEAN | 87        |    |
| Rv3320c       | 60  | -----SVAHAIDLLARAT-----                        | HTR-----            | YHEFWSCTV | 84        |    |
| Rv2530c       | 61  | -----TPAIAIAQLAAMT-----                        | SLA-----            | GHTFWPDDV | 85        |    |
| Rv2494        | 60  | -----GIADARRVVALR-----                         | AVG-----            | GHRFLADDV | 84        |    |
| Rv2872        | 62  | -----SPQDAWQAVDALL-----                        | AAP-----            | AAMRLRPE  | 86        |    |
| Rv0749        | 62  | -----PRAEAFAFVEAVT-----                        | AQP-----            | HHLPTNPGP | 86        |    |
| Rv0277c       | 62  | -----PRADAFAFVEAVN-----                        | AQP-----            | HHLPTSPGP | 86        |    |
| Rv2829c       | 57  | -----AIPVLSWLQQLA-----                         | E-----              | HVRTVGITP | 78        |    |
| Rv1242        | 62  | -----PTADAIAYVREWLE-----                       | SQP-----            | NVDLLTAGP | 86        |    |
| Rv2863        | 57  | -----NSTLDSALTLV-----                          | RA-----             | LTEIWPVEA | 78        |    |
| Rv2549c       | 54  | -----HRAVAATAAIR-----                          | LST-----            | VVRVEHVTA | 76        |    |
| Rv1953        | 54  | -----TDPTQSEHLRRWF-----                        |                     | DDKVLRFV  | 75        |    |
| Rv2757c       | 51  | -----EDHRTLGLTYRR-----                         | DAL-----            | EYVNTPD   | 71        |    |
| Rv2546        | 49  | -----TDYDALADEL-----                           | DGL-----            | ARIPVGA   | 68        |    |
| Rv0301        | 53  | -----TARREFREPPL-----                          | SAM-----            | PVEYLTPT  | 73        |    |
| Rv2527        | 47  | -----TDYDSQQTSL-----                           | RAY-----            | QILRAPS   | 66        |    |
| Rv0240        | 61  | -----EGPEAAEVCQTFR-----                        | RNR-----            | RWALLENAP | 85        |    |
| Consensus aa: |     | .....h.....                                    |                     | ..h.hs.   |           |    |
| Consensus ss: |     | hhhhhhhhh                                      | h                   | eee h     |           |    |

Conservation:

|            |    |                     |               |    |
|------------|----|---------------------|---------------|----|
| Rv0624     | 73 | -----DQADAARAA----- | YRTYGKGRH--RA | 92 |
| MSMEG_1284 | 74 | -----DQADAARLA----- | YRRYGKGRH--RA | 93 |

|               |     |                                                                    |     |
|---------------|-----|--------------------------------------------------------------------|-----|
| Rv2759c       | 74  | -----DQARVAAQA---YRDYGRGSG-HPA                                     | 94  |
| Rv0609        | 74  | -----RQARLARAA---YADFGRGSG-HPA                                     | 94  |
| Rv1982c       | 75  | -----EHAATQRA---FLRYGKGRH--RA                                      | 94  |
| Rv0582        | 76  | -----AEIEQAARI---VTKYQDQ----                                       | 91  |
| Rv1561        | 74  | -----IDFRAAAGIYRAARRAGET-----                                      | 92  |
| Rv0065        | 82  | -----RLIEYTW---QLRH-----                                           | 92  |
| Rv3408        | 77  | -----PVIOLAETI---GP-----A                                          | 88  |
| Rv3384c       | 74  | -----RVLDLAGGL---LP-----F                                          | 85  |
| Rv1962c       | 74  | -----VIRSTAAAY---PN-----P                                          | 85  |
| Rv2231        | 192 | AFADWVPGEPQSLADDSLPDVLVLRSLTKTWSLAGLRVGYALGSPDVLARLTVQ-----RAH---W | 249 |
| Rv0665        | 76  | -----AVMISLARL---VADCRAG--V                                        | 93  |
| Rv0627        | 77  | -----DAARMWARL---RIHLAESG--R                                       | 94  |
| Rv0595c       | 75  | -----AVSEAWALL---VSKLRAAK---L                                      | 92  |
| Rv1720c       | 78  | -----PFTQRAYQL---R-----S                                           | 88  |
| Rv0960        | 75  | -----GLFERIWEI---R-----A                                           | 85  |
| Rv0661c       |     | -----                                                              |     |
| Rv0549c       | 90  | -----LLAGAWSR---RD-----                                            | 99  |
| Rv0656c       | 61  | -----SVWRWIDSA---QHRLARAGA--VG                                     | 80  |
| Rv2596        | 77  | -----CSYRGLTDH---LAEHDVT-----                                      | 92  |
| Rv0598c       | 80  | -----RTTEHLPRV---LAQFEIT-----                                      | 95  |
| Rv2548        | 70  | -----DIARIGGRL---ARRYRSSH---R                                      | 87  |
| Rv2103c       | 87  | -----RHADILARM---LTYVGTG-----                                      | 102 |
| Rv1397c       | 69  | -----VIARRAGDM---MRRYRRSH---N                                      | 86  |
| Rv0617        | 80  | -----SFAGVEVAG---VV---G                                            | 91  |
| Rv1838c       | 80  | -----TDVEHARDA---LLRYQ-----                                        | 93  |
| Rv2010        | 71  | -----VRDAEDAAAI---HRRCRGG---D                                      | 89  |
| Rv1114        | 65  | -----HDEVLRLL---VGRRLWG---R                                        | 80  |
| Rv2602        | 90  | -----DGLEAQWRA---FAVRQSP---A                                       | 106 |
| Rv3180c       | 95  | -----DACR-----                                                     | 98  |
| Rv3697c       | 88  | -----GFWPVYRRV---ADPVKPR-----                                      | 103 |
| Rv3320c       | 85  | -----SILD-SKVI---DRSRLHS-----                                      | 99  |
| Rv2530c       | 86  | -----PLIV-GSAG---DRDAVSN-----                                      | 100 |
| Rv2494        | 85  | -----SLVDDD-----VPLIVG-----                                        | 96  |
| Rv2872        | 87  | -----RHWMAFRQL---ASDVDAN-----                                      | 102 |
| Rv0749        | 87  | -----RHLMLLRKL---CDEADAS-----                                      | 102 |
| Rv0277c       | 87  | -----RHLVLLRKL---CDEADAS-----                                      | 102 |
| Rv2829c       | 79  | -----SVAATAVAL---PSSF-----                                         | 91  |
| Rv1242        | 87  | -----RHLDIALGL---LDKLGTA-----                                      | 102 |
| Rv2863        | 79  | -----ADVAHARTL---HHRHP-----                                        | 92  |
| Rv2549c       | 77  | -----DLEEQAWEW---LVRHDER-----                                      | 92  |
| Rv1953        | 76  | -----FARRGTNL-----                                                 | 83  |
| Rv2757c       | 72  | -----TVWVRWEI---QEALTDKGF--HR                                      | 91  |
| Rv2546        | 69  | -----ETFTRACQV---QRELAHVAGLHHR                                     | 90  |
| Rv0301        | 74  | -----RIEDRALEV---QTLADRGH--HR                                      | 93  |
| Rv2527        | 67  | -----DIFRVRHL---QRDLAHHRG-MWH                                      | 87  |
| Rv0240        | 86  | VMNEVW---VLAATPRIARRR-----                                         | 103 |
| Consensus aa: |     | .....h..h..h.....                                                  |     |
| Consensus ss: |     | hhhhhhhhh hhh                                                      |     |

|               |     |                                                                       |     |   |   |  |  |
|---------------|-----|-----------------------------------------------------------------------|-----|---|---|--|--|
| Conservation: |     |                                                                       | 9   | 5 | 6 |  |  |
| Rv0624        | 93  | GLN-----YGDC-FSYGLAKISGQ-----PLLFKG---EDFQ-HT                         | 122 |   |   |  |  |
| MSMEG_1284    | 94  | GLN-----YGDC-FSYALAKVSGQ-----PLLFKG---EAFR-LT                         | 123 |   |   |  |  |
| Rv2759c       | 95  | RLN-----LGDT-YSYALAQVTGE-----PLLFGR---DDFT-HT                         | 124 |   |   |  |  |
| Rv0609        | 95  | GLN-----FGDC-LSYALADRRE-----PLLWKG---NDFG-HT                          | 124 |   |   |  |  |
| Rv1982c       | 95  | ALN-----FGDC-MTYATAQLGHQ-----PLLAVG---NDFP-QT                         | 124 |   |   |  |  |
| Rv0582        | 92  | RIG-----IADA-ANVVLADRYRTR-----TILTLD---RRHFSAL                        | 123 |   |   |  |  |
| Rv1561        | 93  | VRS-----INDC-LIAALAIRHGA-----RIVHRD---ADFD-VI                         | 122 |   |   |  |  |
| Rv0065        | 93  | NVT-----FYDA-LYVALATALDV-----PLLTGD---SRLA-AA                         | 122 |   |   |  |  |
| Rv3408        | 89  | TLR-----SLDA-IHLAAAQIKREL---TAFVTYD---HRLL-SG                         | 121 |   |   |  |  |
| Rv3384c       | 86  | ELR-----TLDA-IHLATAQRLGVDL---GRLCYD---DRMR-DA                         | 118 |   |   |  |  |
| Rv1962c       | 86  | ALR-----SLDA-IHLATAQTAGSVAP--LTALVTYD---NRLK-EA                       | 120 |   |   |  |  |
| Rv2231        | 250 | PLGTLQLTAIAACCAPRAVAAAAADAVRLTALRA-EMVAGLRVSGAEVVDGAAPFVLFNIADAGLR-NY | 317 |   |   |  |  |
| Rv0665        | 94  | RRSV-----KLTDA-LIAATAEIKV-----                                        | 112 |   |   |  |  |
| Rv0627        | 95  | RVR-----INDL-WIAAVAASRAL-----PVITQD---DDFA-AL                         | 124 |   |   |  |  |
| Rv0595c       | 93  | RVP-----INDS-WIAATAVAHG1-----AILTQD---NDYA-AM                         | 122 |   |   |  |  |
| Rv1720c       | 89  | THT-----VADG-AYVALAEGLV-----PLITCD---GRLA-QS                          | 118 |   |   |  |  |
| Rv0960        | 86  | NLS-----AYDA-SYVALAEALNC-----ALVTAD---LRLS-DT                         | 115 |   |   |  |  |
| Rv0661c       | 95  | GLE-----ACDA-VLAAVAASAGAT---ALVSAD---PAFA-DL                          | 125 |   |   |  |  |
| Rv0549c       | 100 | TLR-----LTDA-LYVELAETAGL---VLLTTD---ERLA-RA                           | 129 |   |   |  |  |
| Rv0656c       | 81  | ALS-----VVDL-LICDTAAARGL---VVLHDD---ADYE-LA                           | 110 |   |   |  |  |
| Rv2596        | 93  | GGA-----TYDA-LVGFTAKAAGA---KLLTRD---LRAV-ET                           | 122 |   |   |  |  |
| Rv0598c       | 96  | GGA-----VYDA-LVALAAEHRA---ELATRD---ARAK-DT                            | 125 |   |   |  |  |
| Rv2548        | 88  | GID-----DVDY-LIAATAIVVDA---DLLTTN---VRHFPMF                           | 118 |   |   |  |  |
| Rv2103c       | 103 | ANL-----VNDA-HLAALAVEHRA---SIVSYD---SDFG-RF                           | 132 |   |   |  |  |
| Rv1397c       | 87  | RIG-----LGDY-LIAATADVQDL---QLATLN---VWHFPMF                           | 117 |   |   |  |  |
| Rv0617        | 92  | HRQ-----VTDA-YLAQLARSHDG---QLATLD---SGLAHLH                           | 122 |   |   |  |  |
| Rv1838c       | 94  | TLS-----ARDA-LHIAVMAHHIT---RLMSFD---RGFD-SY                           | 124 |   |   |  |  |
| Rv2010        | 90  | TVR-----SLIDC-QVAAMALRIGV---AVHRD---RDYE-AI                           | 120 |   |   |  |  |
| Rv1114        | 81  | GLG-----AVDANLLGSVALVGGG---RLWTRD---KRLK-AA                           | 111 |   |   |  |  |
| Rv2602        | 107 | PKV-----WMDA-YLAAFALTGGF---ELVTTD---TAF-T-QY                          | 136 |   |   |  |  |

```

Rv3180c      99  -----IISV-VPVVLEVRRAEP-----AHPATPY---PEPLA-RC 128
Rv3697c     104  GNL-----VDA-HLVALMRHHGIA-----TIWSD-----RDFR-KF 134
Rv3320c     100  PRQ-----VTD-YLLALAVAHDG-----RFVTFD-----QSIA-LT 129
Rv2530c     101  HRR-----VTD-HLIALAARYGG-----RLVTFD-----AALA-DS 130
Rv2494      97  YRQ-----VTD-HLLTLARRRGV-----RLVTFD-----AGVF-TL 126
Rv2872     103  GND-----IADA-HLAAYALENNA-----TWLSAD-----RGFA-RF 132
Rv0749     103  GDL-----IPDA-VLAATAVGHHC-----AVVSLD-----RDFR-RF 132
Rv0277c     103  GDL-----IPDA-VLGATAVEHHC-----AVVSLD-----RDFR-RF 132
Rv2829c     92  PGD-----PADR-LIYATAIEHGW-----RLVTKD-----RRLR-SH 121
Rv1242     103  SHL-----TDDV-QLAAYGIEYDA-----EIHSSD-----TDFR-RF 132
Rv2863     93  GLG-----ARDL-LHLACCQRRTGVT-----RIKTFD-----HTLA-SA 123
Rv2549c     93  EYS-----FVDA-TSFAVMRKGKIQ-----NAYAFD-----GDFS--A 122
Rv1953      84  -----IMQPLAGHI-----GYSLYS-----GISW-F- 103
Rv2757c     92  SVK-----IPDL-IIAAVAEHHGI-----PVMHYD-----QDFE-RI 121
Rv2546      91  SVK-----IADL-VIAAAAELSGT-----IVWHYD-----ENYD-RV 120
Rv0301      94  GPS-----IPDL-LIAATAELSGL-----TVLHVD-----KDFD-AI 123
Rv2527      88  RTP-----LPDL-FIAETALHHRA-----GVLHHD-----RDYK-RI 117
Rv0240     104  -----LFDA-RLALTLRHGVD-----EFATRN-----INGFTDF 132
Consensus aa: .....h.Dh.hhhht.....hhh.s.....h...h
Consensus ss: .....hhhh hhhhhhh.....eeee hhh hh

```

Conservation:

```

Rv0624      123  DIATVALP----- 130
MSMEG_1284  124  DVAAVH----- 129
Rv2759c     125  DIRPACT----- 131
Rv0609      125  GVQRALDRR----- 133
Rv1982c     125  DLEFRGVVG-----YWPQVA----- 139
Rv0582      124  RPIGGGRFT-----VIP----- 135
Rv1561      123  ARIT-NLQA-----ASFR----- 134
Rv0065      123  PGLPCEIKL-----VR----- 133
Rv3408      122  CREV-GFVT-----ASPGAVR----- 136
Rv3384c     119  AKTL-GMAV-----IAPS----- 130
Rv1962c     121  AEAL-SLAV-----VAPQAR----- 135
Rv2231      318  LQSK-GIAV-----RRGDTFVGLDARYLRAAVRPEWVPLVAAIAEWAKRGGRR 364
Rv0665      125  DG---AAS-----VEIRV----- 135
Rv0595c     123  PD---VEV-----ITI----- 130
Rv1720c     119  HGHNAEIEL-----VA----- 129
Rv0960      116  GQAQCPITV-----VPR----- 127
Rv0661c     126  SDVV-HVIPDA-AGMVSLLGDR----- 145
Rv0549c     130  WPSA-HAIG----- 137
Rv0656c     111  ERHL-PDIR-----VRRVVSADD----- 127
Rv2596      123  YERL-RVEV-----ELVT----- 134
Rv0598c     126  YEKI-GVHV-----VVAA----- 137
Rv2548      119  PDL-----QPPY----- 125
Rv2103c     133  EGVRW-----DQPALL----- 144
Rv1397c     118  EQLK---PPF-----AVPGHRPRA----- 133
Rv0617      123  GDVAV-----LIPTT----- 133
Rv1838c     125  PGIKRLA----- 131
Rv2010      121  RTHC-GLRT-----EPLF----- 132
Rv1114      112  CAES-GVAL-----AEEVS----- 124
Rv2602      137  GGIE--LRL-----LAK----- 146
Rv3180c     129  SRSP-GLNESSHMSGRIPP----- 146
Rv3697c     135  EGIRI-----RDPFSG----- 145
Rv3320c     130  AVPGATKQH-----LATL----- 142
Rv2530c     131  ASAGL-----VEVL----- 139
Rv2494      127  AQQRPKTPVE---LLTIL----- 141
Rv2872     133  RRLRW-----RHPLDGQTHL----- 147
Rv0749     133  ASVRH-----IRPPL----- 142
Rv0277c     133  ASVRH-----IRPPI----- 142
Rv2829c     122  RHPRP-----VTW----- 130
Rv1242     133  ADLKW-----TDPLRE----- 143
Rv2863     124  FRS----- 126
Rv2549c     123  AGFVE-----VRPE----- 131
Rv1953      122  AAIT-RQPV-----EWVAPGTA----- 138
Rv2546     121  AAIT-GQPT-----EWIVPRGTL----- 137
Rv0301     124  AALT-GQKT-----ERLTHRPPSA----- 141
Rv2527     118  AVVRPGFQA-----CELSRGR----- 133
Rv0240     133  GFSR-VWD-----PITSDG----- 145
Consensus aa: .....
Consensus ss: .....

```

**Fig. S1.** Multiple sequence alignment of mycobacterial VapCs. Sequences were aligned using the ClustalW2 multiple sequence alignment tool at the European Bioinformatics Institute website, <http://www.ebi.ac.uk/Tools/clustalw2/index.html>
