# Supplementary material for: VapC Toxins from Mycobacterium tuberculosis Are Ribonucleases that Differentially Inhibit Growth and Are Neutralized by Cognate VapB Antitoxins
Source: PubMed Central journal article supplement (PMC3126847; doi:10.1371/journal.pone.0021738), 2011-06-29
Supplement: pone.0021738.s002.pdf [file pone.0021738.s002.pdf]

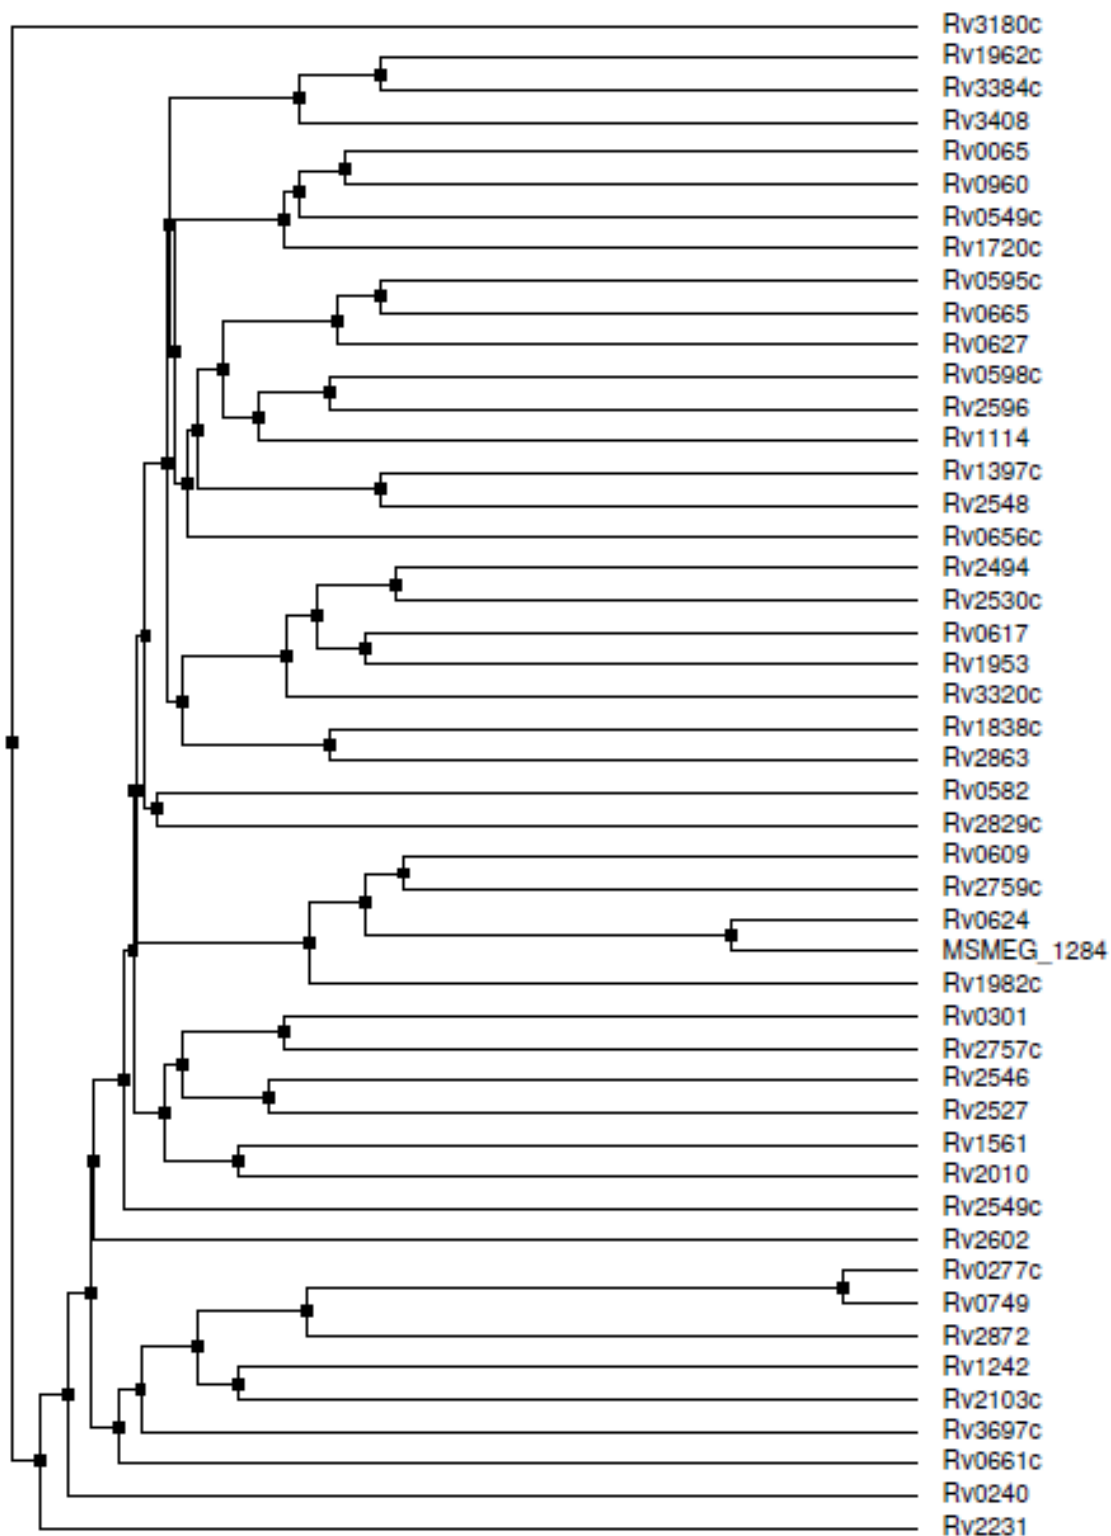

**Fig. S2.** Phylogenetic tree of VapC proteins from mycobacteria. VapC proteins were aligned using ClustalW2 multiple sequence and server alignment server (<http://www.ebi.ac.uk/Tools/clustalw2/index.html>). The tree was generated in Jalview 2.08.1 based on percentage identity between sequences.
