# Supplementary material for: VapC Toxins from Mycobacterium tuberculosis Are Ribonucleases that Differentially Inhibit Growth and Are Neutralized by Cognate VapB Antitoxins
Source: PubMed Central journal article supplement (PMC3126847; doi:10.1371/journal.pone.0021738), 2011-06-29
Supplement: pone.0021738.s003.pdf [file pone.0021738.s003.pdf]

**Table S1.** Properties of mycobacterial *vapBC* toxin-antitoxin modules selected for study

| Gene                    | In vitro essentiality <sup>a</sup> | Other properties and/or features                                                                                                                                                                                                                                                |
|-------------------------|------------------------------------|---------------------------------------------------------------------------------------------------------------------------------------------------------------------------------------------------------------------------------------------------------------------------------|
| <b>Antitoxin (VapB)</b> |                                    |                                                                                                                                                                                                                                                                                 |
| Rv0550c                 | No [1]                             | Induced by heat stress [2], during macrophage infections [3] and high concentrations of vancomycin [4]                                                                                                                                                                          |
| Rv0596c                 | -                                  | Induced in a <i>sigE</i> mutant after SDS stress [5]                                                                                                                                                                                                                            |
| Rv0626                  | -                                  | Induced <i>in vivo</i> but not <i>in vitro</i> [6]; repressed during infection of human macrophage-like cells [7]; and structure of C-terminal region determined in complex with toxin Rv0627 [8]                                                                               |
| Rv1952                  | No [1]                             | Induced during phosphate starvation [9] and during macrophage infections [7]                                                                                                                                                                                                    |
| Rv2009                  | No [1]                             | Induced during human macrophage infections [3,10], in SCID mice [6], after SDS stress [5] and during transition to hypoxia [3]; but repressed during nutrient starvation [11], hypoxia [12], and in wild type H37Rv vs. a <i>phoP</i> mutant [13]; Part of a genomic island [3] |
| Rv2545                  | No [1]                             | Repressed at low pH <i>in vitro</i> [14]; and a P19L polymorphism was identified in MDR strain of Mtb [15]                                                                                                                                                                      |
| Rv2547                  | No [1]                             | Induced during hypoxia [3,16] and infection of macrophages [3,17]                                                                                                                                                                                                               |
| Rv2550c                 | No [1,18]                          | Induced during macrophage infections [17], in Balb/c mice [6], in the presence of high iron concentrations [19] and SDS stress [5]; but repressed by hypoxia [20] and in a <i>sigE</i> mutant after SDS stress [5]                                                              |
| Rv2830c                 | Yes [1]                            | Induced during hypoxia [21], SDS stress [5] and during <i>in vitro</i> and <i>in vivo</i> growth [6]                                                                                                                                                                            |
| Rv3321c                 | No [1]                             | Induced in SCID mice [6] and during human macrophage infections [10]                                                                                                                                                                                                            |
| MSMEG_1283              | -                                  | -                                                                                                                                                                                                                                                                               |
| <b>Toxin (VapC)</b>     |                                    |                                                                                                                                                                                                                                                                                 |
| Rv0549c                 | No [1]                             | Induced by hypoxia [3,16], SDS stress [5], during adaptation to nutrient starvation [22], during infection of human macrophages [3,10], and in the presence of high concentrations of vancomycin [4]. Non-toxic in <i>E. coli</i> [23] but toxic in <i>M. smegmatis</i> [3]     |
| Rv0595c                 | No [1]                             | Required for survival in nonhuman primate lungs [24]; induced during adaptation to nutrient starvation [22], macrophage infection [17] and by SDS stress [5]. Part of a genomic island [3]. Toxic in <i>E. coli</i> [23] but not in <i>M. smegmatis</i> [3]                     |
| Rv0627                  | Yes [1]                            | Structure determined in complex with C-terminal part of antitoxin (Rv0626) and biochemical evidence for ribonuclease activity [25]. Non-                                                                                                                                        |

|            |           |                                                                                                                                                                                                                                                                                                                                                            |
|------------|-----------|------------------------------------------------------------------------------------------------------------------------------------------------------------------------------------------------------------------------------------------------------------------------------------------------------------------------------------------------------------|
|            |           | toxic when over-expressed in <i>E. coli</i> [23] or <i>M. smegmatis</i> [3] but toxic when over-expressed in <i>M. tuberculosis</i> [25]                                                                                                                                                                                                                   |
| Rv1953     | No [1,18] | C-terminally truncated and lacking part of the PIN domain. Induced during adaptation to nutrient starvation [22]. Non-toxic in <i>E. coli</i> [23] and <i>M. smegmatis</i> [3]                                                                                                                                                                             |
| Rv2010     | No [1]    | Induced during hypoxia [16] and in Balb/c mice [6], but repressed during nutrient starvation [11], adaptation to hypoxia [12] and in wild type H37Rv compared to a <i>phoP</i> mutant [13]. Protein identified in 30-d infected guinea pig lungs [26]. Part of a genomic island [3]. Non-toxic in <i>E. coli</i> [23] but toxic in <i>M. smegmatis</i> [3] |
| Rv2546     | No [1]    | Induced in Balb/c mice [6] and during treatment with SRI#967, a compound exhibiting strong anti-mycobacterial properties [27]. Non-toxic in <i>E. coli</i> [23] and <i>M. smegmatis</i> [3]                                                                                                                                                                |
| Rv2548     | No [1]    | Induced during hypoxia [16] and macrophage infections [17], but repressed in sputum [28]. Non-toxic in <i>E. coli</i> [23] but toxic in <i>M. smegmatis</i> [3]                                                                                                                                                                                            |
| Rv2549c    | No [1]    | Induced during macrophage infection [17] and in the presence of high iron concentrations [19]. Toxic in <i>E. coli</i> [23] but non-toxic in <i>M. smegmatis</i> [3]                                                                                                                                                                                       |
| Rv2829c    | -         | Induced during macrophage infection [3], hypoxia [3,12] and nutrient starvation [22]. Protein identified in 30-d infected guinea pig lungs [26]. Non-toxic in <i>E. coli</i> [23] but toxic in <i>M. smegmatis</i> [3]                                                                                                                                     |
| Rv3320c    | No [1]    | Repressed during hypoxia [12] and nutrient starvation [11]. Part of a genomic island [3]. Non-toxic in <i>M. smegmatis</i> [3]                                                                                                                                                                                                                             |
| MSMEG_1284 | -         | Toxic in <i>M. smegmatis</i> [29]                                                                                                                                                                                                                                                                                                                          |

a. Deduced from genome-wide essentiality screens

## References

1. Sassetti CM, Boyd DH, Rubin EJ (2003) Genes required for mycobacterial growth defined by high density mutagenesis. *Mol Microbiol* 48: 77-84.
2. Stewart GR, Wernisch L, Stabler R, Mangan JA, Hinds J, et al. (2002) Dissection of the heat-shock response in *Mycobacterium tuberculosis* using mutants and microarrays. *Microbiology* 148: 3129-3138.
3. Ramage HR, Connolly LE, Cox JS (2009) Comprehensive functional analysis of *Mycobacterium tuberculosis* toxin-antitoxin systems: implications for pathogenesis, stress responses, and evolution. *PLoS Genet* 5: e1000767.
4. Provvedi R, Boldrin F, Falciani F, Palu G, Manganelli R (2009) Global transcriptional response to vancomycin in *Mycobacterium tuberculosis*. *Microbiology* 155: 1093-1102.
5. Manganelli R, Voskuil MI, Schoolnik GK, Smith I (2001) The *Mycobacterium tuberculosis* ECF sigma factor sigmaE: role in global gene expression and survival in macrophages. *Mol Microbiol* 41: 423-437.
6. Talaat AM, Lyons R, Howard ST, Johnston SA (2004) The temporal expression profile of *Mycobacterium tuberculosis* infection in mice. *Proc Natl Acad Sci USA* 101: 4602-4607.

7. Fontan P, Aris V, Ghanny S, Soteropoulos P, Smith I (2008) Global transcriptional profile of *Mycobacterium tuberculosis* during THP-1 human macrophage infection. *Infect Immun* 76: 717-725.
8. Miallau L, Faller M, Chiang J, Arbing M, Guo F, et al. (2009) Structure and proposed activity of a member of the VapBC family of toxin-antitoxin systems: VapBC-5 from *Mycobacterium tuberculosis*. *J Biol Chem* 284: 276-283.
9. Rifat D, Bishai WR, Karakousis PC (2009) Phosphate depletion: a novel trigger for *Mycobacterium tuberculosis* persistence. *J Infect Dis* 200: 1126-1135.
10. Dubnau E, Fontan P, Manganelli R, Soares-Appel S, Smith I (2002) *Mycobacterium tuberculosis* genes induced during infection of human macrophages. *Infect Immun* 70: 2787-2795.
11. Betts JC, Lukey PT, Robb LC, McAdam RA, Duncan K (2002) Evaluation of a nutrient starvation model of *Mycobacterium tuberculosis* persistence by gene and protein expression profiling. *Mol Microbiol* 43: 717-731.
12. Sherman DR, Voskuil M, Schnappinger D, Liao R, Harrell MI, et al. (2001) Regulation of the *Mycobacterium tuberculosis* hypoxic response gene encoding alpha -crystallin. *Proc Natl Acad Sci USA* 98: 7534-7539.
13. Walters SB, Dubnau E, Kolesnikova I, Laval F, Daffe M, et al. (2006) The *Mycobacterium tuberculosis* PhoPR two-component system regulates genes essential for virulence and complex lipid biosynthesis. *Mol Microbiol* 60: 312-330.
14. Fisher MA, Plikaytis BB, Shinnick TM (2002) Microarray analysis of the *Mycobacterium tuberculosis* transcriptional response to the acidic conditions found in phagosomes. *J Bacteriol* 184: 4025-4032.
15. Ioerger TR, Koo S, No EG, Chen X, Larsen MH, et al. (2009) Genome analysis of multi- and extensively-drug-resistant tuberculosis from KwaZulu-Natal, South Africa. *PLoS One* 4: e7778.
16. Muttucumararu DG, Roberts G, Hinds J, Stabler RA, Parish T (2004) Gene expression profile of *Mycobacterium tuberculosis* in a non-replicating state. *Tuberculosis (Edinb)* 84: 239-246.
17. Stewart GR, Patel J, Robertson BD, Rae A, Young DB (2005) Mycobacterial mutants with defective control of phagosomal acidification. *PLoS Pathog* 1: 269-278.
18. Lamichhane G, Zignol M, Blades NJ, Geiman DE, Dougherty A, et al. (2003) A postgenomic method for predicting essential genes at subsaturation levels of mutagenesis: application to *Mycobacterium tuberculosis*. *Proc Natl Acad Sci U S A* 100: 7213-7218.
19. Rodriguez GM, Voskuil MI, Gold B, Schoolnik GK, Smith I (2002) *ideR*, An essential gene in *Mycobacterium tuberculosis*: role of IdeR in iron-dependent gene expression, iron metabolism, and oxidative stress response. *Infect Immun* 70: 3371-3381.
20. Sherman DR, Voskuil M, Schnappinger D, Liao R, Harrell MI, et al. (2001) Regulation of the *Mycobacterium tuberculosis* hypoxic response gene encoding alpha -crystallin. *Proc Natl Acad Sci U S A* 98: 7534-7539.
21. Park HD, Guinn KM, Harrell MI, Liao R, Voskuil MI, et al. (2003) Rv3133c/dosR is a transcription factor that mediates the hypoxic response of *Mycobacterium tuberculosis*. *Mol Microbiol* 48: 833-843.
22. Hampshire T, Soneji S, Bacon J, James BW, Hinds J, et al. (2004) Stationary phase gene expression of *Mycobacterium tuberculosis* following a progressive nutrient depletion: a model for persistent organisms? *Tuberculosis (Edinb)* 84: 228-238.

23. Gupta A (2009) Killing activity and rescue function of genome-wide toxin-antitoxin loci of *Mycobacterium tuberculosis*. FEMS Microbiol Lett 290: 45-53.
24. Dutta NK, Mehra S, Didier PJ, Roy CJ, Doyle LA, et al. (2010) Genetic requirements for the survival of tubercle bacilli in primates. J Infect Dis 201: 1743-1752.
25. Miallau L, Faller M, Chiang J, Arbing M, Guo F, et al. (2009) Structure and proposed activity of a member of the VapBC family of toxin-antitoxin systems. VapBC-5 from *Mycobacterium tuberculosis*. J Biol Chem 284: 276-283.
26. Kruh NA, Trout J, Izzo A, Prenni J, Dobos KM (2010) Portrait of a pathogen: The *Mycobacterium tuberculosis* proteome in vivo. PLoS One 5: e13938.
27. Waddell SJ, Stabler RA, Laing K, Kremer L, Reynolds RC, et al. (2004) The use of microarray analysis to determine the gene expression profiles of *Mycobacterium tuberculosis* in response to anti-bacterial compounds. Tuberculosis (Edinb) 84: 263-274.
28. Garton NJ, Waddell SJ, Sherratt AL, Lee SM, Smith RJ, et al. (2008) Cytological and transcript analyses reveal fat and lazy persister-like bacilli in tuberculous sputum. PLoS Med 5: e75.
29. Robson J, McKenzie JL, Cursons R, Cook GM, Arcus VL (2009) The *vapBC* operon from *Mycobacterium smegmatis* is an autoregulated toxin-antitoxin module that controls growth via inhibition of translation. J Mol Biol 390: 353-367.
