# Supplementary material for: VapC Toxins from Mycobacterium tuberculosis Are Ribonucleases that Differentially Inhibit Growth and Are Neutralized by Cognate VapB Antitoxins
Source: PubMed Central journal article supplement (PMC3126847; doi:10.1371/journal.pone.0021738), 2011-06-29
Supplement: pone.0021738.s004.pdf [file pone.0021738.s004.pdf]

**Table S2.** VapC toxicity in *M. smegmatis* mc<sup>2</sup>155 assessed by transformation efficiency of VapC expression vector<sup>a</sup>

| VapC       | Vector    | CFU/ $\mu$ g      |
|------------|-----------|-------------------|
| -          | pSE100    | $2.7 \times 10^4$ |
| Rv0549c    | pSE0549c  | 63                |
| Rv0595c    | pSE0595c  | 8                 |
| Rv0627     | pSE0627   | $2.4 \times 10^4$ |
| Rv1953     | pSE1953   | $2.6 \times 10^4$ |
| Rv2010     | pSE2010   | $2.1 \times 10^3$ |
| Rv2546     | pSE2546   | $3.5 \times 10^4$ |
| Rv2548     | pSE2548   | $2.0 \times 10^4$ |
| Rv2549c    | pSE2549c  | 11                |
| Rv2829c    | pSE2829c  | 15                |
| Rv3320c    | pSE3320c  | 1                 |
| MSMEG_1284 | pSESM1284 | $1.5 \times 10^4$ |

a. The data shown are from one of three independent experiments.
