# Supplementary material for: VapC Toxins from Mycobacterium tuberculosis Are Ribonucleases that Differentially Inhibit Growth and Are Neutralized by Cognate VapB Antitoxins
Source: PubMed Central journal article supplement (PMC3126847; doi:10.1371/journal.pone.0021738), 2011-06-29
Supplement: pone.0021738.s005.pdf [file pone.0021738.s005.pdf]

**Table S3.** VapC toxicity in Mtb assessed by transformation efficiency of VapC expression vector<sup>a</sup>

| Wild type (H37Rv) |          |                   | $\Delta$ Rv2545-Rv2550c |          |                   |
|-------------------|----------|-------------------|-------------------------|----------|-------------------|
| VapC              | Vector   | CFU/ $\mu$ g      | VapC                    | Vector   | CFU/ $\mu$ g      |
| -                 | pSE100   | $3.0 \times 10^6$ | -                       | pSE100   | $1.0 \times 10^5$ |
| Rv0549c           | pSE0549c | $1.4 \times 10^4$ | Rv0549c                 | pSE0549c | $1.9 \times 10^5$ |
| Rv0595c           | pSE0595c | $3.3 \times 10^3$ | Rv0595c                 | pSE0595c | $8.2 \times 10^2$ |
| Rv0627            | pSE0627  | $8.7 \times 10^6$ | Rv0627                  | pSE0627  | $1.1 \times 10^6$ |
| Rv1953            | pSE1953  | $5.6 \times 10^6$ | Rv1953                  | pSE1953  | $1.4 \times 10^5$ |
| Rv2010            | pSE2010  | $9.7 \times 10^6$ | Rv2010                  | pSE2010  | $2.6 \times 10^6$ |
| Rv2546            | pSE2546  | $1.6 \times 10^6$ | Rv2546                  | pSE2546  | $1.1 \times 10^5$ |
| Rv2548            | pSE2548  | $2.6 \times 10^6$ | Rv2548                  | pSE2548  | $1.5 \times 10^4$ |
| Rv2549c           | pSE2549c | $8.4 \times 10^2$ | Rv2549c                 | pSE2549c | $7.1 \times 10^2$ |
| Rv2829c           | pSE2829c | $1.0 \times 10^4$ | Rv2829c                 | pSE2829c | $1.1 \times 10^3$ |
| Rv3320c           | pSE3320c | $9.0 \times 10^2$ | Rv3320c                 | pSE3320c | 0                 |

a. The data shown are from one of three independent experiments.
