# Supplementary material for: VapC Toxins from Mycobacterium tuberculosis Are Ribonucleases that Differentially Inhibit Growth and Are Neutralized by Cognate VapB Antitoxins
Source: PubMed Central journal article supplement (PMC3126847; doi:10.1371/journal.pone.0021738), 2011-06-29
Supplement: pone.0021738.s006.pdf [file pone.0021738.s006.pdf]

**Table S4.** Strains and plasmids used in this study

| <b>Name</b>             | <b>Description</b>                                                                                                                                                                                                                                                                                                       | <b>Source</b>    |
|-------------------------|--------------------------------------------------------------------------------------------------------------------------------------------------------------------------------------------------------------------------------------------------------------------------------------------------------------------------|------------------|
| <u>Strains</u>          |                                                                                                                                                                                                                                                                                                                          |                  |
| <i>M. tuberculosis</i>  |                                                                                                                                                                                                                                                                                                                          |                  |
| H37Rv                   | ATCC 25618, virulent laboratory strain                                                                                                                                                                                                                                                                                   | Laboratory stock |
| H37Ra                   | ATCC25177, avirulent laboratory strain                                                                                                                                                                                                                                                                                   | Laboratory stock |
| $\Delta Rv0595c$        | Derivative of H37Rv carrying an unmarked deletion in the <i>vapC</i> gene <i>Rv0595c</i>                                                                                                                                                                                                                                 | This work        |
| $\Delta Rv2009-Rv2010$  | Derivative of H37Rv carrying an unmarked deletion in the <i>vapBC</i> operon <i>Rv2009-Rv2010</i>                                                                                                                                                                                                                        | This work        |
| $\Delta Rv2545-Rv2550c$ | Derivative of H37Rv carrying an unmarked deletion spanning from <i>Rv2545</i> to <i>Rv2550c</i>                                                                                                                                                                                                                          | This work        |
| <i>M. smegmatis</i>     |                                                                                                                                                                                                                                                                                                                          |                  |
| mc <sup>2</sup> 155     | <i>ept-1</i> , efficient plasmid transformation mutant of mc <sup>2</sup> 6                                                                                                                                                                                                                                              | [1]              |
| $\Delta MSMEG1283-1284$ | Derivative of mc <sup>2</sup> 155 carrying an unmarked deletion in the <i>vapBC</i> operon <i>MSMEG_1283-MSMEG_1284</i>                                                                                                                                                                                                  | This work        |
| mc <sup>2</sup> 4517    | <i>ept-1</i> , efficient plasmid transformation mutant of mc <sup>2</sup> 6, expression strain with T7 RNA polymerase                                                                                                                                                                                                    | [2]              |
| Yeast                   |                                                                                                                                                                                                                                                                                                                          |                  |
| AH109                   | <i>HIS3, ADE2, lacZ, MEL1</i> containing reporter strain for screening protein interactions, <i>MATa, trp1-901, leu2-3, 112, ura3-52, his3-200, gal4_, gal80_, LYS2::GAL1<sup>UAS</sup>-GAL1<sup>TATA</sup>-HIS3, MEL1 GAL2<sup>UAS</sup>GAL2<sup>TATA</sup>-ADE2, URA3::MEL1<sup>UAS</sup>-MEL1<sup>TATA</sup>-lacZ</i> | Clontech         |
| <u>Plasmids</u>         |                                                                                                                                                                                                                                                                                                                          |                  |
| p2NIL                   | <i>E. coli</i> cloning vector; Km <sup>R</sup>                                                                                                                                                                                                                                                                           | [3]              |
| pGEM3Z(+)               | <i>E. coli</i> cloning vector; Ap <sup>R</sup>                                                                                                                                                                                                                                                                           | Promega          |
| pGOAL17                 | Plasmid carrying the <i>lacZ</i> and <i>sacB</i> genes as a <i>PacI</i> cassette; Ap <sup>R</sup>                                                                                                                                                                                                                        | [3]              |
| pGOAL19                 | Plasmid carrying the <i>lacZ</i> , <i>sacB</i> and <i>hyg</i> genes as a <i>PacI</i> cassette; Ap <sup>R</sup>                                                                                                                                                                                                           | [3]              |

|                |                                                                                                                                          |           |
|----------------|------------------------------------------------------------------------------------------------------------------------------------------|-----------|
| p2Δ0595cKO     | Knockout vector for creating an unmarked deletion in <i>M. tuberculosis Rv0595c</i> ; Km <sup>R</sup> , Hyg <sup>R</sup>                 | This work |
| p2Δ2009_10KO   | Knockout vector for creating an unmarked deletion in <i>M. tuberculosis Rv2009-Rv2010</i> ; Km <sup>R</sup> , Hyg <sup>R</sup>           | This work |
| p2Δ2545_50cKO  | Knockout vector for creating a <i>hyg</i> -marked deletion in <i>M. tuberculosis Rv2545-Rv2550c</i> ; Km <sup>R</sup> , Hyg <sup>R</sup> | This work |
| p2ΔSM1283_84KO | Knockout vector for creating an unmarked deletion in <i>M. smegmatis MSMEG_1283-MSMEG_1284</i> ; Km <sup>R</sup> , Hyg <sup>R</sup>      | This work |
| pOLYG          | <i>E. coli</i> -Mycobacterium shuttle vector; Hyg <sup>R</sup>                                                                           | [4]       |
| pSE100         | <i>E. coli</i> -Mycobacterium shuttle vector carrying P <sub>myc1</sub> <i>tetO</i> ; Hyg <sup>R</sup>                                   | [5]       |
| pSE0549c       | pSE100 carrying <i>Rv0549c</i> under control of P <sub>myc1</sub> <i>tetO</i> ; Hyg <sup>R</sup>                                         | This work |
| pSE0627        | pSE100 carrying <i>Rv0627</i> under control of P <sub>myc1</sub> <i>tetO</i> ; Hyg <sup>R</sup>                                          | This work |
| pSE1953        | pSE100 carrying <i>Rv1953</i> under control of P <sub>myc1</sub> <i>tetO</i> ; Hyg <sup>R</sup>                                          | This work |
| pSE2010        | pSE100 carrying <i>Rv2010</i> under control of P <sub>myc1</sub> <i>tetO</i> ; Hyg <sup>R</sup>                                          | This work |
| pSE2829c       | pSE100 carrying <i>Rv2829c</i> under control of P <sub>myc1</sub> <i>tetO</i> ; Hyg <sup>R</sup>                                         | This work |
| pSE2546        | pSE100 carrying <i>Rv2546</i> under control of P <sub>myc1</sub> <i>tetO</i> ; Hyg <sup>R</sup>                                          | This work |
| pSE2548        | pSE100 carrying <i>Rv2548</i> under control of P <sub>myc1</sub> <i>tetO</i> ; Hyg <sup>R</sup>                                          | This work |
| pSE2549c       | pSE100 carrying <i>Rv2549c</i> under control of P <sub>myc1</sub> <i>tetO</i> ; Hyg <sup>R</sup>                                         | This work |
| pSE3320c       | pSE100 carrying <i>Rv3320c</i> under control of P <sub>myc1</sub> <i>tetO</i> ; Hyg <sup>R</sup>                                         | This work |
| pSE0550c_49c   | pSE100 carrying <i>Rv0550c-Rv0549c</i> under control of P <sub>myc1</sub> <i>tetO</i> ; Hyg <sup>R</sup>                                 | This work |
| pSE0596c_95c   | pSE100 carrying <i>Rv0596c-Rv0595c</i> under control of P <sub>myc1</sub> <i>tetO</i> ; Hyg <sup>R</sup>                                 | This work |
| pSE2550c_49c   | pSE100 carrying <i>Rv2550c-Rv2549c</i> under control of P <sub>myc1</sub> <i>tetO</i> ; Hyg <sup>R</sup>                                 | This work |
| pSE2830c_29c   | pSE100 carrying <i>Rv2830c-Rv2829c</i> under control of P <sub>myc1</sub> <i>tetO</i> ; Hyg <sup>R</sup>                                 | This work |
| pSESM1284      | pSE100 carrying <i>MSMEG_1284</i> under control of P <sub>myc1</sub> <i>tetO</i> ; Hyg <sup>R</sup>                                      | This work |
| pSE2546_FLAG   | pSE100 carrying a C-terminally FLAG-tagged <i>Rv2546</i> under control of P <sub>myc1</sub> <i>tetO</i> ; Hyg <sup>R</sup>               | This work |
| pSE2549c_FLAG  | pSE100 carrying a C-terminally FLAG-tagged <i>Rv2549c</i> under control of P <sub>myc1</sub> <i>tetO</i> ; Hyg <sup>R</sup>              | This work |
| pMC1s          | L5-based integration vector carrying P <sub>smyc</sub> - <i>tetR</i> ; Km <sup>R</sup>                                                   | [5]       |

|               |                                                                                                                           |                           |
|---------------|---------------------------------------------------------------------------------------------------------------------------|---------------------------|
| pMC1r         | Derivative of pMC1s; Km <sup>R</sup>                                                                                      | This work                 |
| pMC2m         | L5-based integration vector carrying P <sub>imyc</sub> - <i>tetR</i> ; Km <sup>R</sup>                                    | D. Schnappinger & S. Ehrt |
| pTTP1B        | Tweety-based integration vector; Ap <sup>R</sup> ; Km <sup>R</sup>                                                        | [6]                       |
| pTTP1BG       | Derivative of pTTP1B with Km <sup>R</sup> marker replaced by Gm <sup>R</sup> marker from pML10 [7]; Gm <sup>R</sup>       | This work                 |
| pTTP1BGs      | Derivative of pTTP1BG carrying P <sub>smyc</sub> - <i>tetR</i> from pMC1s; Gm <sup>R</sup>                                | This work                 |
| pTT2549c      | pTTP1BGs derivative carrying P <sub>myc1</sub> <i>tetO</i> :: <i>Rv2549c</i> ; Gm <sup>R</sup>                            | This work                 |
| pTT0595c      | pTTP1BGs derivative carrying P <sub>myc1</sub> <i>tetO</i> :: <i>Rv0595c</i> ; Gm <sup>R</sup>                            | This work                 |
| pOLYGaa       | pOLYG derivative carrying <i>M. smegmatis</i> acetamidase promoter (P <sub>ami</sub> ) from pAGAN11 [8]; Hyg <sup>R</sup> | D. Warner                 |
| pMAP          | Derivative of pMC1r carrying P <sub>ami</sub> cloned as a 4.4-kb <i>PvuII/ClaI</i> fragment from pOLYGaa; Km <sup>R</sup> | This work                 |
| pMAP2550c     | Integration vector carrying P <sub>ami</sub> :: <i>Rv2550c</i> ; Km <sup>R</sup>                                          | This work                 |
| pMAP2830c     | Integration vector carrying P <sub>ami</sub> :: <i>Rv2830c</i> ; Km <sup>R</sup>                                          | This work                 |
| pMAP0596c     | Integration vector carrying P <sub>ami</sub> :: <i>Rv0596c</i> ; Km <sup>R</sup>                                          | This work                 |
| pGADT7        | Y2H vector to produce AD fusions, <i>GAL4</i> <sub>(768-881)</sub> AD, <i>LEU2</i> , HA epitope tag; Ap <sup>R</sup>      | Clontech                  |
| pGAD0595c     | pGADT7 containing <i>Rv0595c</i> fused to <i>GAL4</i> AD                                                                  | This work                 |
| pGAD0596c     | pGADT7 containing <i>Rv0596c</i> fused to <i>GAL4</i> AD                                                                  | This work                 |
| pGAD2549c     | pGADT7 containing <i>Rv2549c</i> fused to <i>GAL4</i> AD                                                                  | This work                 |
| pGAD2550c     | pGADT7 containing <i>Rv2550c</i> fused to <i>GAL4</i> AD                                                                  | This work                 |
| pGAD2830c     | pGADT7 containing <i>Rv2830c</i> fused to <i>GAL4</i> AD                                                                  | This work                 |
| pGBKT7        | Y2H vector to produce BD fusions, <i>GAL4</i> <sub>(1-147)</sub> DNA-BD, <i>TRP1</i> , c-MYC epitope tag; Km <sup>R</sup> | Clontech                  |
| pGBK0595c     | pGBKT7 containing <i>Rv0595c</i> fused to <i>GAL4</i> BD                                                                  | This work                 |
| pGBK0596c     | pGBKT7 containing <i>Rv0596c</i> fused to <i>GAL4</i> BD                                                                  | This work                 |
| pGBK2549c     | pGBKT7 containing <i>Rv2549c</i> fused to <i>GAL4</i> BD                                                                  | This work                 |
| pYUB28b       | <i>E. coli</i> -Mycobacterium shuttle vector with T7 promoter and C-terminal His-tag; Hyg <sup>R</sup>                    | [9]                       |
| pYUBRv0065A-5 | pYUB28b derivative carrying the Rv0065A-Rv0065 operon for protein expression; Hyg <sup>R</sup>                            | This work                 |
| pYUBRv0616A-6 | pYUB28b derivative carrying the Rv0616A-Rv0617 operon for protein expression; Hyg <sup>R</sup>                            | This work                 |

## References

1. Snapper SB, Melton RE, Mustafa S, Kieser T, Jacobs WR, Jr. (1990) Isolation and characterization of efficient plasmid transformation mutants of *Mycobacterium smegmatis*. Mol Microbiol 4: 1911-1919.
2. Wang F, Jain P, Gulten G, Liu Z, Feng Y, et al. (2010) *Mycobacterium tuberculosis* dihydrofolate reductase is not a target relevant to the antitubercular activity of isoniazid. Antimicrob Agents Chemother 54: 3776-3782.
3. Parish T, Stoker NG (2000) Use of a flexible cassette method to generate a double unmarked *Mycobacterium tuberculosis tlyA plcABC* mutant by gene replacement. Microbiology 146 1969-1975.
4. O'Gaora P, Barnin S, Hayward C, Filley E, Rook G, et al. (1997) Mycobacteria as immunogens: development of expression vectors for use in multiple mycobacterial species. Med Princ Prac 6: 91-96.
5. Ehrt S, Guo XV, Hickey CM, Ryou M, Monteleone M, et al. (2005) Controlling gene expression in mycobacteria with anhydrotetracycline and Tet repressor. Nucleic Acids Res 33: e21.
6. Pham TT, Jacobs-Sera D, Pedulla ML, Hendrix RW, Hatfull GF (2007) Comparative genomic analysis of mycobacteriophage Tweety: evolutionary insights and construction of compatible site-specific integration vectors for mycobacteria. Microbiology 153: 2711-2723.
7. Labes M, Puhler A, Simon R (1990) A new family of RSF1010-derived expression and lac-fusion broad-host-range vectors for gram-negative bacteria. Gene 89: 37-46.
8. Parish T, Mahenthiralingam E, Draper P, Davis EO, Colston MJ (1997) Regulation of the inducible acetamidase gene of *Mycobacterium smegmatis*. Microbiology 143 ( Pt 7): 2267-2276.
9. Bashiri G, Rehan AM, Greenwood DR, Dickson JM, Baker EN (2010) Metabolic engineering of cofactor F420 production in *Mycobacterium smegmatis*. PLoS One 5: e15803.
