# Supplementary material for: VapC Toxins from Mycobacterium tuberculosis Are Ribonucleases that Differentially Inhibit Growth and Are Neutralized by Cognate VapB Antitoxins
Source: PubMed Central journal article supplement (PMC3126847; doi:10.1371/journal.pone.0021738), 2011-06-29
Supplement: pone.0021738.s007.pdf [file pone.0021738.s007.pdf]

**Table S5.** Oligonucleotides used to create knockout vectors for allelic exchange mutagenesis

| Gene(s)                   | Internal deletion size (bp) | Knockout vector | Oligonucleotide pairs used for vector construction                             |                                                                                                 |
|---------------------------|-----------------------------|-----------------|--------------------------------------------------------------------------------|-------------------------------------------------------------------------------------------------|
|                           |                             |                 | Sequence (5'-3') <sup>a</sup>                                                  | Region amplified                                                                                |
| <i>M. tuberculosis</i>    |                             |                 |                                                                                |                                                                                                 |
| Rv0595c                   | 325                         | p2Δ0595cKO      | GCAGA <u>AAGCTT</u> ACGAAAAGATCGGGC<br>GGCT <u>AGATCT</u> GTACGTTACCAACCGCAC   | 1990 bp amplicon containing 10 bp of the 5' end of Rv0595c and 1980 bp of upstream sequence     |
|                           |                             |                 | GAGC <u>AGATCT</u> GACCCAAGACAACGACTA<br>GTAT <u>GCGGCCGCCTAACCTT</u> CACCAGAC | 2027 bp amplicon containing 58 bp of the 3' end of Rv0595c and 1969 bp of downstream sequence   |
| Rv2545-<br>Rv2550c        | 2415                        | p2Δ2545_50cKO   | TGATA <u>AAGCTT</u> GATGACGATCTCGCGCAG<br>TAAT <u>AGATCT</u> GAGATATATGCATTGGA | 2052 bp amplicon containing 131 bp of the 5' end of Rv2545 and 1921 bp of upstream sequence     |
|                           |                             |                 | ATGT <u>AGATCT</u> GCAGCCTTTTCACA<br>TTAT <u>GGTACCAGGGACTAT</u> CAG           | 1776 bp amplicon containing 42 bp of the 3' end of Rv2550c and 1734 bp of downstream sequence   |
| <i>M. smegmatis</i>       |                             |                 |                                                                                |                                                                                                 |
| MSMEG_1283-<br>MSMEG_1284 | 378                         | p2ΔSM1283_84KO  | TGATA <u>AAGCTT</u> GCTCATAACGGCCAGGC<br>TAAT <u>AGATCT</u> CTGGCCAGCCGGTCCG   | 965 bp amplicon containing 23 bp of the 5' end of MSMEG1283 and 932 bp of upstream sequence     |
|                           |                             |                 | CGCCG <u>AGATCT</u> GTGGTTGCATCGC<br>TGAT <u>GGTACCGAGCAGTGGCTACT</u> GG       | 1099 bp amplicon containing 219 bp of the 3' end of MSMEG1284 and 880 bp of downstream sequence |

a. Restriction sites used for cloning are underlined
