# Supplementary material for: VapC Toxins from Mycobacterium tuberculosis Are Ribonucleases that Differentially Inhibit Growth and Are Neutralized by Cognate VapB Antitoxins
Source: PubMed Central journal article supplement (PMC3126847; doi:10.1371/journal.pone.0021738), 2011-06-29
Supplement: pone.0021738.s008.pdf [file pone.0021738.s008.pdf]

**Table S6.** Oligonucleotides used for expression vector construction, yeast two-hybrid (Y2H) vector construction and RT-PCR

| Name                                                                                        | Forward (5'-3') <sup>a</sup>         | Reverse (5'-3')                                                                                             |
|---------------------------------------------------------------------------------------------|--------------------------------------|-------------------------------------------------------------------------------------------------------------|
| <b>Oligonucleotides used for expression vector construction</b>                             |                                      |                                                                                                             |
| Toxins and toxin-antitoxin modules under control of P <sub>myc1</sub> <i>tetO</i> in pSE100 |                                      |                                                                                                             |
| Rv0549c                                                                                     | TAATGGATCCGGAAGGAATCGAAGCGTGAGAGCATC | CGCACTGCAGTGTGCTCGGCAATG                                                                                    |
| Rv0550c-Rv0549c                                                                             | ATCTGGATCCGGAGGAAGGCCTTGTTGAGCCG     | CGCACTGCAGTGTGCTCGGCAATG                                                                                    |
| Rv0595c                                                                                     | ATGTGGATCCAGGAAGGACGATGTGCGGTGGTG    | TACTCTGCAGCCGGCGCGATCAGGTA                                                                                  |
| Rv0596c-Rv0595c                                                                             | CTAAGGATCCGGAGGAACCTCGTAGCATGTCTGCT  | TACTCTGCAGCCGGCGCGATCAGGTA                                                                                  |
| Rv0627                                                                                      | TAGTCTGCAGGAAGGATCCGGTGAGCACGACG     | TACTAAGCTTCGTCGACTGAGGCCGC                                                                                  |
| Rv1953                                                                                      | TACTGGATCCGGAAGGACGCAACTGTGACCTACGT  | GAATCTGCAGTGTACAGTCGCAACCTG                                                                                 |
| Rv2010                                                                                      | TACTGGATCCGGAAGAGTCGTAGATGATCGTC     | TGCACTGCAGATGTGAGACACGAAATC                                                                                 |
| Rv2546                                                                                      | ACTGGGATCCGGAAGGTGATGGTGTCTGCGTC     | TGATAAGCTTGGGTACCTGAGTCCGCATG                                                                               |
| Rv2546_FLAG                                                                                 | ACTGGGATCCGGAAGGTGATGGTGTCTGCGTC     | GGGGAAGCTTCTACTTGTTCATCGTCATCCTTG<br>TAATCTATATCGTGATCTTTATAATCACCGTCA<br>TGGTCTTTGTAGTCAAGGGTCCCGCGCGGCAC  |
| Rv2548                                                                                      | ACTGGGATCCGGAAGGTCTGGCGTGAAGCTGAT    | CGCGAAGCTTGCTGATGCCCCAGGGAGT                                                                                |
| Rv2549c                                                                                     | TGATGGATCCGGAAGCACGAATGATCTTC        | TGTAAAGCTTCAACGCAACGCAGCCCTGT                                                                               |
| Rv2549c_FLAG                                                                                | TGATGGATCCGGAAGCACGAATGATCTTC        | GGGGAAGCTTCTACTTGTTCATCGTCATCCTTGTA<br>ATCTATATCGTGATCTTTATAATCACCGTCATGG<br>TCTTTGTAGTCCCTCGGGTCTTACCTCGAC |
| Rv2550c-Rv2549c                                                                             | CGTAGGATCCGGAGGAACAGCATTATGCTAGTGG   | TGTAAAGCTTCAACGCAACGCAGCCCTGT                                                                               |
| Rv2829c                                                                                     | GGGCGGATCCGGAAGGAACGTTTCATGACGACGGTG | GCGGCTGCAGTTCGGTGATGTTGCGGC                                                                                 |

|                                                          |                                      |                                   |
|----------------------------------------------------------|--------------------------------------|-----------------------------------|
| Rv2830c-Rv2829c                                          | CTGAGGATCCAGAAGAAAAATGACCGCTACGGA    | GCGGCTGCAGTTCGGTGATGTTGCGGC       |
| Rv3320c                                                  | ATAGGATCCAGGAAGGAGGCCGTGTGATCGA      | TCCTCTGCAGCCGGGTCTACAGCGTT        |
| MSMEG_1284                                               | TTCTAAGCTTGGAAGGTCCTGATGGTTATCGAC    | CGATGGATCCTGACCTGAATTCTGACCT      |
| Antitoxins under control of P <sub>ami</sub> in Pmap     |                                      |                                   |
| Rv2550c                                                  | CGTAGAATTCGGAGGAACAGCATTATGCTAGTGG   | GCCCATCGATTAAAGTGCAGCCCAGAA       |
| Rv0596c                                                  | TAGTGAATTCGTGAGGAATCGTAGCATGTCTGCTA  | TCACATCGATTCATACGTTACCACCGCACA    |
| Rv2830c                                                  | TACTGAATTCGTGAGGAAAGAAAAATGACCGCTACG | TGCAATCGATACTATGTCATGAAACGTTCCACG |
| Toxin-antitoxin modules under control of T7 in pYUB28b   |                                      |                                   |
| Rv0065A-5                                                | GTTACCATGGCTACCATTCAAGTTCGGGA        | GCAAGCTTCCGAACGAGTTTGATTTTCG      |
| Rv0616A-5                                                | TAATCCATGGTGCGCACTACCATCGA           | TAAAGCTTGGTGGTCGTTGGAATGAG        |
| <b>Oligonucleotides used for Y2H vector construction</b> |                                      |                                   |
| Rv0595c                                                  | TGACATATGAACGTACGGCGCGCC             | TGAGAATTCTCAGATCGTTATGACCTC       |
| Rv0596c                                                  | TAACATATGTCTGCTACGATACCC             | TGAGAATTCTCACCACCGCACATCGTC       |
| Rv2549c                                                  | TAACATATGATCTTCGTCGACACG             | TGAGAATTCTCTACTCGGGTCTTACCTC      |
| Rv2550c                                                  | GGCCATATGCTAGTGGCGTATATT             | GGCGAATTCTCATTCTGTGCTTTCCGTA      |
| Rv2830c                                                  | TAACATATGACCGCTACGGAGGTG             | TGAGAATTCTCATGAAACGTTCCACGA       |
| <b>Oligonucleotides used for RT-PCR</b>                  |                                      |                                   |
| Rv0549c                                                  | TGCCATGGTGGATCTACTGGCTCGC            | AACACCTCTGCATCGAAGTGCGCCG         |
| Rv0595c                                                  | AACCACTAGGCATCGACGAGGCGG             | CGTTGATCGGCACGCGCAGTTTGG          |
| Rv0627                                                   | GGTGTTTCATCGCGACCGAAAGCGG            | GATTCCAGGGTCGCCAGGCGTTGA          |
| Rv2010                                                   | ACGTCAGAGTCGTTGGCCAGTCGC             | GCTCCATCATCACCACCTCGGGCA          |

|                          |                      |                      |
|--------------------------|----------------------|----------------------|
| Rv2546                   | TATACCAGTCGGTGCCGAAA | ACACGATGGTGCCTGAAAGT |
| Rv2549c                  | TCTTCCAGGTCGGCTGTTAC | GATGACCTCCAACCATGTCC |
| Rv2829c                  | CTCGACTCGCATGTGGCCTA | AGCCAGCTCGAACCACGAA  |
| <i>M. smegmatis sigA</i> | GGGCGTGATGTCCATCTCCT | GTATCCCGGTGCACATGGTC |

a. Restriction sites used for cloning are underlined

b. Italicized sequence represents the 3× FLAG tag (Asp Tyr Lys Asp His Asp Gly Asp Tyr Lys Asp His Asp Ile Asp Tyr Lys Asp Asp Asp Asp Lys)
